# Supplementary material for: Candida-Reactive T Cells for the Diagnosis of Invasive Candida Infection—A Prospective Pilot Study
Source: PubMed Central journal article supplement (PMC6024001; doi:10.3389/fmicb.2018.01381), 2018-06-22
Supplement: Image_1.pdf [file Image_1.pdf]

**Figure S1. Cut-off determination.**

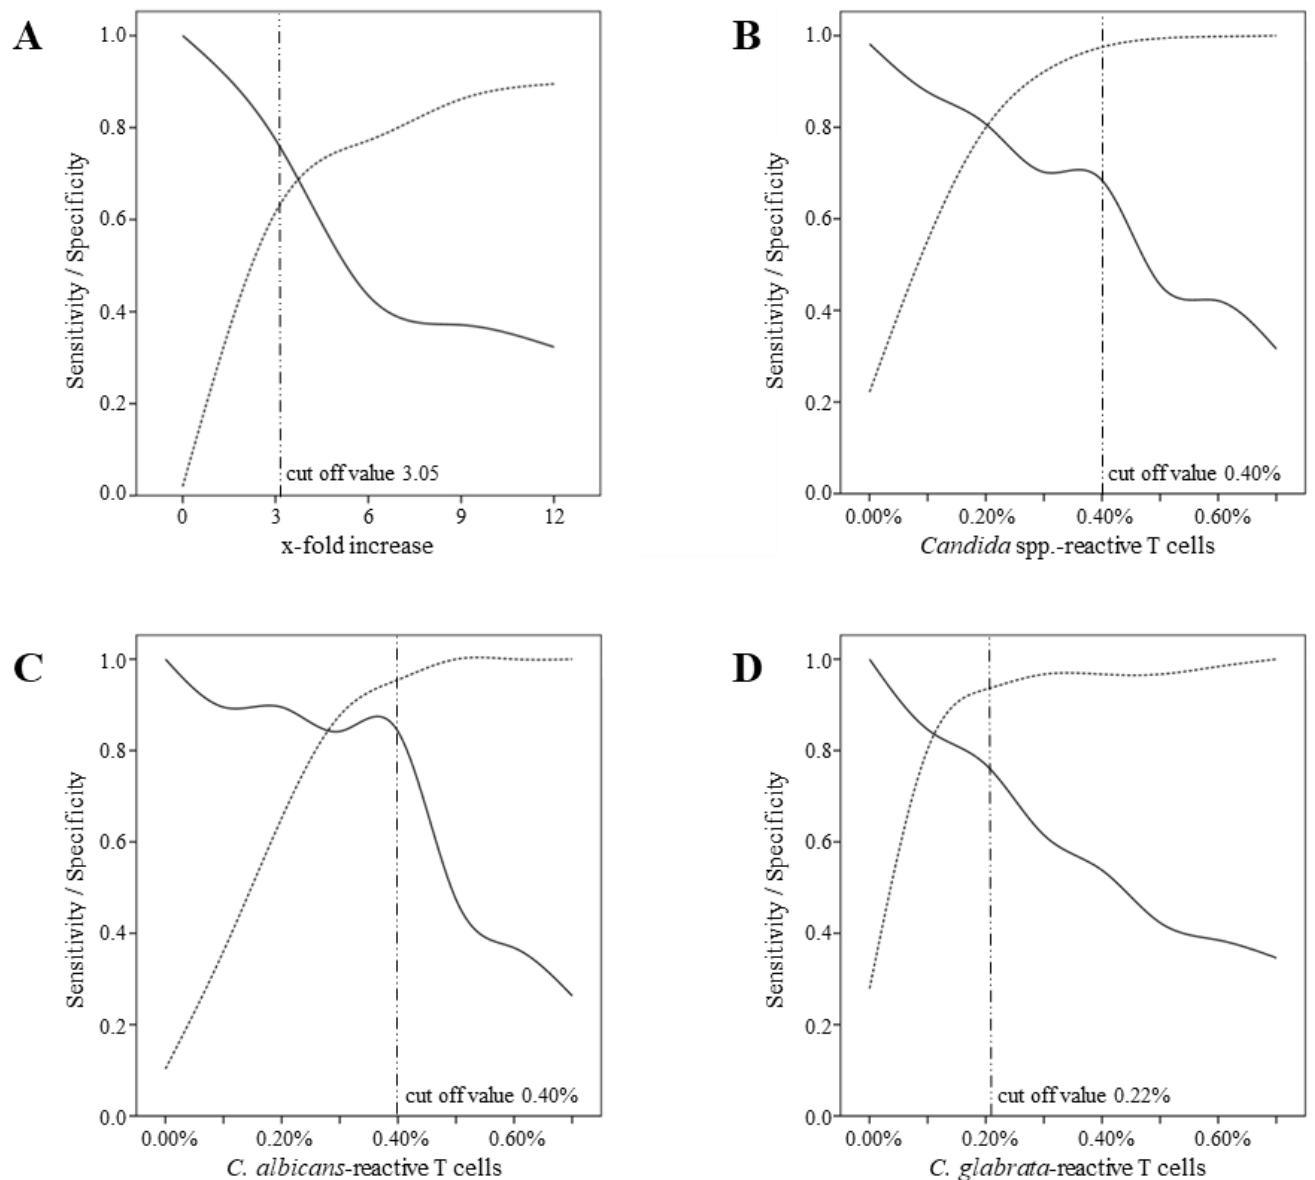

Cut-off values to discriminate between healthy donors and disease control and patients with proven invasive *Candida* infection and were calculated by receiver operating characteristic (ROC) curve analysis. Given is the fold increase and the frequency of *Candida*-reactive CD69<sup>+</sup>/CD154<sup>+</sup> T cells among CD4<sup>+</sup> T cells with the respective sensitivity and specificity. Solid line = sensitivity, dashed line = specificity. (A) Cut-off determination of fold-increase of *Candida*-reactive T cells compared to unstimulated CD4<sup>+</sup> T cells. 456 measurements of 119 individuals without invasive *Candida* infection; 62 measurements of 13 individuals with proven invasive *Candida* infection. (B) Cut-off determination of elevated levels of *Candida* spp. CD69<sup>+</sup>/CD154<sup>+</sup>-reactive T cells among CD4<sup>+</sup> T cells. 483 measurements of 119 individuals without invasive *Candida* infection; 57 measurements of 13 individuals with proven invasive *Candida* infection. (C) Cut-off determination of elevated levels of *C. albicans*-reactive T cells CD69<sup>+</sup>/CD154<sup>+</sup>-reactive T cells among CD4<sup>+</sup> T cells. 155 measurements of 127

individuals without invasive *C. albicans* infection; 19 measurements of 6 individuals with proven invasive *C. albicans* infection. **(D)** Cut-off determination of elevated levels of *C. glabrata*-reactive T cells CD69<sup>+</sup>/CD154<sup>+</sup>-reactive T cells among CD4<sup>+</sup> T cells. 61 measurements of 31 individuals without invasive *C. glabrata* infection; 26 measurements of 6 individuals with proven invasive *C. glabrata* infection.
